# Supplementary material for: Why and how do dual users quit vaping? Survey findings from adults who use electronic and combustible cigarettes
Source: PubMed Central journal article supplement (PMC7885258; doi:10.18332/tid/132547), 2021-02-16
Supplement: TID-19-12-s1.pdf [file TID-19-12-s1.pdf]

**Supplemental document to:**

**Why and how do dual users quit vaping? Survey findings from adults who use electronic and  
combustible cigarettes**

Elias M. Klemperer, Ph.D. & Andrea C. Villanti, Ph.D., MPH

**Table S1.** Characteristics of excluded participants (n=162)

|                                       |                                     |                     |
|---------------------------------------|-------------------------------------|---------------------|
| <b>Sex: Female, % (95% CI)</b>        |                                     | 32.1 (25.3 to 39.7) |
| <b>Mean (SD) age</b>                  |                                     | 35.2 (9.1)          |
| <b>Marital Status, % (95% CI)</b>     |                                     |                     |
|                                       | Married or living as if married     | 61.1 (53.3 to 68.4) |
|                                       | Widowed, divorced, separated        | 4.3 (2.1 to 8.8)    |
|                                       | Never married                       | 34.6 (27.6 to 42.2) |
| <b>Education, % (95% CI)</b>          |                                     |                     |
|                                       | < High school                       | 1.9 (0.6 to 5.6)    |
|                                       | High school graduate or GED         | 8.6 (5.2 to 14.1)   |
|                                       | Some college or Associates degree   | 20.4 (14.8 to 27.3) |
|                                       | Bachelor's or advanced degree       | 69.1 (61.6 to 75.8) |
| <b>Hispanic ethnicity, % (95% CI)</b> |                                     | 13.0 (8.6 to 19.1)  |
| <b>Race, % (95% CI)</b>               |                                     |                     |
|                                       | American Indian or Alaska Native    | 1.2 (0.3 to 4.8)    |
|                                       | Asian                               | 4.9 (2.5 to 9.6)    |
|                                       | Black or African American           | 8.6 (5.2 to 14.1)   |
|                                       | Native Hawaiian or Pacific Islander | 1.2 (0.3 to 4.8)    |
|                                       | White                               | 84.0 (77.4 to 88.9) |
| <b>Employment, % (95% CI)</b>         |                                     |                     |
|                                       | Full-time $\geq$ 35 hours per week  | 85.8 (79.5 to 90.4) |
|                                       | Part-time < 35 hours per week       | 8.6 (5.2 to 14.1)   |
|                                       | Don't currently work for pay        | 5.6 (2.9 to 10.4)   |
| <b>Past 30 day use</b>                |                                     |                     |
|                                       | Daily EC use                        | 23.5 (17.5 to 30.7) |
|                                       | Daily CC use                        | 8.6 (5.2 to 14.1)   |

CC=Combustible cigarette; EC=Electronic cigarette; GED=General Education Development; SD=Standard deviation

**Table S2.** Motivations and methods for quitting e-cigarettes (EC) and combustible cigarettes (CC) among dual users (N=204).

|                                                       | <b>ECs</b><br>% (95% CI) | <b>CCs</b><br>% (95% CI) |
|-------------------------------------------------------|--------------------------|--------------------------|
| <b><sup>a</sup>Motivations to quit</b>                |                          |                          |
| Health                                                | 74.0 (67.7 to 79.6)      | 77.5 (71.1 to 82.7)      |
| Money/cost                                            | 45.1 (38.4 to 52.0)      | 44.6 (37.9 to 51.5)      |
| Reduce the risk from COVID-19                         | 24.5 (19.1 to 30.9)      | 26.0 (20.4 to 32.5)      |
| Increased ECs                                         | -                        | 12.7 (8.8 to 18.1)       |
| Increased other tobacco                               | 20.1 (15.1 to 26.2)      | 4.9 (2.6 to 26.2)        |
| Freedom from addiction                                | 15.2 (10.9 to 20.8)      | 17.2 (12.6 to 23.0)      |
| For another person                                    | 17.2 (12.6 to 23.0)      | 19.1 (14.3 to 25.1)      |
| To perform better in school etc                       | 19.1 (14.3 to 25.1)      | 12.3 (8.4 to 17.5)       |
| Negative experience while using                       | 15.7 (11.3 to 21.4)      | 14.2 (10.0 to 19.7)      |
| Difficulty obtaining                                  | 14.2 (10.0 to 19.7)      | 9.8 (6.4 to 14.7)        |
| Embarrassed by my use                                 | 8.8 (5.6 to 13.6)        | 10.8 (7.2 to 15.9)       |
| Didn't like the taste or smell                        | 11.8 (8.0 to 17.0)       | 14.2 (10.0 to 19.7)      |
| Didn't like it anymore                                | 7.8 (4.8 to 12.5)        | 6.9 (4.1 to 11.3)        |
| Other                                                 | 2.0 (0.7 to 5.1)         | 1.0 (0.2 to 3.9)         |
| <b><sup>a</sup>Methods used to quit</b>               |                          |                          |
| Cut down before quitting                              | 68.1 (61.4 to 74.2)      | 57.4 (50.4 to 64.0)      |
| Cold turkey                                           | 24.0 (18.6 to 30.3)      | 25.0 (19.5 to 31.4)      |
| Got advice from doctor                                | 28.4 (22.6 to 35.0)      | 33.3 (27.2 to 40.1)      |
| Switched to ECs                                       | -                        | 16.7 (12.1 to 22.5)      |
| Switched to low nicotine pods                         | 23.5 (18.2 to 29.9)      | -                        |
| Used NRT                                              | 24.0 (18.6 to 30.4)      | 31.9 (25.8 to 38.6)      |
| Read written material                                 | 23.0 (17.7 to 29.4)      | 17.6 (13.0 to 23.5)      |
| Used an app                                           | 18.1 (13.4 to 24.1)      | 5.4 (3.0 to 9.5)         |
| Went to counseling                                    | 11.8 (8.0 to 17.0)       | 14.2 (10.0 to 19.7)      |
| Switched to different tobacco                         | 6.9 (4.1 to 11.2)        | 3.4 (1.6 to 7.1)         |
| Used bupropion                                        | 7.4 (4.5 to 11.9)        | 14.2 (10.0 to 19.7)      |
| Used varenicline                                      | 4.4 (2.3 to 8.3)         | 7.4 (4.5 to 11.9)        |
| Called a quitline                                     | 2.9 (1.3 to 6.4)         | 3.9 (2.0 to 7.7)         |
| Other                                                 | 1.0 (0.2 to 3.9)         | 1.0 (0.2 to 3.9)         |
| <b><sup>b</sup>Most effective method used to quit</b> |                          |                          |
| Cut down before quitting                              | 33.3 (27.2 to 40.1)      | 32.8 (27.6 to 40.8)      |
| Cold turkey                                           | 10.8 (7.2 to 15.9)       | 10.3 (7.0 to 15.8)       |
| Got advice from doctor                                | 13.7 (9.6 to 19.2)       | 16.7 (12.5 to 23.1)      |
| Switched to ECs                                       | -                        | 5.9 (3.5 to 10.4)        |
| Switched to low nicotine pods                         | 14.2 (10.0 to 19.7)      | -                        |
| Used NRT                                              | 6.9 (4.1 to 11.3)        | 14.2 (10.3 to 20.3)      |
| Read written material                                 | 6.9 (4.1 to 11.3)        | 4.9 (2.7 to 9.2)         |
| Used an app                                           | 4.4 (2.3 to 8.3)         | 2.5 (1.0 to 6.0)         |
| Went to counseling                                    | 4.4 (2.3 to 8.3)         | 4.9 (2.4 to 8.5)         |
| Switched to different tobacco                         | 2.5 (1.0 to 5.8)         | 0.5 (0.1 to 3.5)         |
| Used bupropion                                        | 0.5 (0.1 to 3.5)         | 2.5 (1.0 to 5.8)         |

|                   |                  |                  |
|-------------------|------------------|------------------|
| Used varenicline  | 0.5 (0.1 to 3.5) | 2.0 (0.8 to 5.3) |
| Called a quitline | 1.0 (0.2 to 3.9) | 0                |
| Other             | 1.0 (0.2 to 3.9) | 0.5 (0.1 to 3.5) |

<sup>a</sup>Respondents were instructed to “select all that apply” and thus could select multiple responses.

<sup>b</sup>Respondents were instructed to identify the single method that was “most effective to help you quit.”

Cold turkey=Quit abruptly without help; COVID-19=2019 Novel coronavirus; NRT=Nicotine replacement therapy. All findings are displayed in Figure 1 of the manuscript.

**Table S3.** Point-biserial correlations ( $r_{pb}$ ) between motivations for quitting electronic cigarettes (EC) and combustible cigarettes (CC).

|                          |                        |            | Reasons for quitting ECs |                |                 |                         |                        |              |                              |              |                 |                   |                  |                |              |
|--------------------------|------------------------|------------|--------------------------|----------------|-----------------|-------------------------|------------------------|--------------|------------------------------|--------------|-----------------|-------------------|------------------|----------------|--------------|
|                          |                        |            | Health                   | Money/<br>cost | Taste/<br>Smell | Difficulty<br>obtaining | Negative<br>experience | Embarrassed  | Freedom<br>from<br>addiction | COVID-<br>19 | School/<br>work | Another<br>person | Other<br>tobacco | Didn't<br>like | Other        |
| Reasons for quitting CCs | Health                 | $r_{pb}$   | <b>0.536</b>             | -0.006         | 0.088           | -0.015                  | 0.104                  | -0.039       | 0.065                        | 0.007        | -0.125          | -0.159            | 0.066            | 0.027          | -0.008       |
|                          |                        | $p$ -value | <.001                    | 0.932          | 0.212           | 0.826                   | 0.140                  | 0.580        | 0.355                        | 0.915        | 0.074           | 0.023             | 0.350            | 0.707          | 0.906        |
|                          | Money/cost             | $r_{pb}$   | 0.149                    | <b>0.574</b>   | 0.162           | 0.171                   | 0.020                  | 0.138        | -0.023                       | -0.122       | -0.010          | 0.062             | 0.214            | 0.142          | 0.086        |
|                          |                        | $p$ -value | 0.033                    | <.001          | 0.021           | 0.014                   | 0.780                  | 0.049        | 0.747                        | 0.083        | 0.888           | 0.375             | 0.002            | 0.043          | 0.219        |
|                          | Taste/Smell            | $r_{pb}$   | 0.049                    | 0.308          | <b>0.461</b>    | 0.116                   | 0.210                  | 0.269        | 0.219                        | 0.029        | 0.123           | 0.075             | 0.076            | 0.299          | 0.246        |
|                          |                        | $p$ -value | 0.485                    | <.001          | <.001           | 0.099                   | 0.003                  | <.001        | 0.002                        | 0.679        | 0.079           | 0.284             | 0.280            | <.001          | <.001        |
|                          | Difficulty obtaining   | $r_{pb}$   | -0.143                   | 0.066          | 0.238           | <b>0.432</b>            | 0.220                  | 0.362        | 0.228                        | 0.080        | 0.301           | 0.243             | 0.205            | 0.272          | 0.310        |
|                          |                        | $p$ -value | 0.041                    | 0.351          | <.001           | <.001                   | 0.002                  | <.001        | 0.001                        | 0.253        | <.001           | <.001             | 0.003            | <.001          | <.001        |
|                          | Negative experience    | $r_{pb}$   | -0.079                   | 0.139          | 0.200           | 0.437                   | <b>0.442</b>           | 0.220        | 0.141                        | 0.062        | 0.302           | 0.262             | 0.181            | 0.247          | 0.246        |
|                          |                        | $p$ -value | 0.262                    | 0.048          | 0.004           | <.001                   | <.001                  | 0.002        | 0.045                        | 0.380        | <.001           | <.001             | 0.010            | <.001          | <.001        |
|                          | Embarrassed            | $r_{pb}$   | 0.134                    | 0.098          | 0.314           | 0.221                   | 0.198                  | <b>0.393</b> | 0.249                        | 0.022        | 0.233           | 0.177             | 0.141            | 0.428          | 0.293        |
|                          |                        | $p$ -value | 0.056                    | 0.164          | <.001           | 0.002                   | 0.005                  | <.001        | <.001                        | 0.751        | <.001           | 0.011             | 0.044            | <.001          | <.001        |
|                          | Freedom from addiction | $r_{pb}$   | 0.121                    | 0.032          | 0.116           | 0.113                   | 0.054                  | 0.133        | <b>0.423</b>                 | 0.013        | 0.010           | 0.138             | 0.096            | 0.254          | 0.123        |
|                          |                        | $p$ -value | 0.084                    | 0.652          | 0.098           | 0.109                   | 0.443                  | 0.057        | <.001                        | 0.856        | 0.885           | 0.049             | 0.171            | <.001          | 0.079        |
|                          | COVID-19               | $r_{pb}$   | -0.057                   | 0.047          | 0.096           | 0.239                   | 0.113                  | 0.170        | 0.154                        | <b>0.650</b> | 0.281           | 0.175             | 0.038            | 0.201          | 0.158        |
|                          |                        | $p$ -value | 0.419                    | 0.503          | 0.172           | <.001                   | 0.107                  | 0.015        | 0.028                        | <.001        | <.001           | 0.012             | 0.593            | 0.004          | 0.024        |
|                          | School/work            | $r_{pb}$   | 0.085                    | 0.082          | 0.235           | 0.319                   | 0.168                  | 0.200        | 0.092                        | 0.204        | <b>0.351</b>    | 0.266             | 0.186            | 0.225          | 0.271        |
|                          |                        | $p$ -value | 0.226                    | 0.244          | <.001           | <.001                   | 0.017                  | 0.004        | 0.192                        | 0.003        | <.001           | <.001             | 0.008            | 0.001          | <.001        |
|                          | Another person         | $r_{pb}$   | 0.004                    | 0.085          | 0.171           | 0.195                   | 0.065                  | 0.288        | 0.072                        | 0.042        | 0.239           | <b>0.605</b>      | 0.129            | 0.229          | 0.201        |
|                          |                        | $p$ -value | 0.957                    | 0.224          | 0.015           | 0.005                   | 0.359                  | <.001        | 0.306                        | 0.553        | <.001           | <.001             | 0.065            | <.001          | 0.004        |
|                          | Other tobacco          | $r_{pb}$   | 0.135                    | 0.068          | 0.340           | 0.298                   | 0.277                  | 0.410        | 0.283                        | 0.135        | 0.236           | 0.318             | <b>0.283</b>     | 0.356          | 0.459        |
|                          |                        | $p$ -value | 0.055                    | 0.334          | <.001           | <.001                   | <.001                  | <.001        | <.001                        | 0.055        | <.001           | <.001             | <.001            | <.001          | <.001        |
|                          | Didn't like            | $r_{pb}$   | 0.117                    | 0.144          | 0.262           | 0.223                   | 0.256                  | 0.257        | 0.371                        | 0.071        | 0.164           | 0.134             | 0.251            | <b>0.426</b>   | 0.381        |
|                          |                        | $p$ -value | 0.097                    | 0.040          | <.001           | 0.001                   | <.001                  | <.001        | <.001                        | 0.315        | 0.019           | 0.057             | <.001            | <.001          | <.001        |
|                          | Other                  | $r_{pb}$   | 0.059                    | 0.010          | 0.118           | 0.102                   | 0.094                  | 0.144        | 0.096                        | 0.059        | 0.078           | 0.087             | 0.074            | 0.156          | <b>0.345</b> |
|                          |                        | $p$ -value | 0.402                    | 0.889          | 0.093           | 0.147                   | 0.182                  | 0.039        | 0.170                        | 0.402        | 0.267           | 0.218             | 0.291            | 0.026          | <.001        |

**Table S4.** Point-biserial correlations ( $r_{pb}$ ) between methods used to quit electronic cigarettes (EC) and combustible cigarettes (CC).

|                             |                  |            | Strategies used to quit ECs |              |              |              |              |              |              |                  |              |              |               |                               |
|-----------------------------|------------------|------------|-----------------------------|--------------|--------------|--------------|--------------|--------------|--------------|------------------|--------------|--------------|---------------|-------------------------------|
|                             |                  |            | Reduced                     | Dr.'s advice | NRT          | Bupropion    | Varenicline  | Quitline     | Mobile app   | Written material | Counseling   | Cold turkey  | Other tobacco | Switched to low nicotine pods |
| Strategies used to quit CCs | Reduced          | $r_{pb}$   | <b>0.580</b>                | 0.016        | -0.026       | 0.091        | -0.008       | 0.150        | 0.123        | -0.046           | -0.024       | 0.090        | 0.038         | -0.106                        |
|                             |                  | $p$ -value | <.001                       | 0.819        | 0.716        | 0.195        | 0.912        | 0.032        | 0.080        | 0.513            | 0.738        | 0.198        | 0.589         | 0.132                         |
|                             | Dr.'s advice     | $r_{pb}$   | -0.007                      | <b>0.499</b> | 0.114        | 0.159        | 0.203        | 0.123        | 0.045        | 0.156            | 0.226        | -0.057       | 0.096         | 0.196                         |
|                             |                  | $p$ -value | 0.916                       | <.001        | 0.106        | 0.023        | 0.004        | 0.079        | 0.523        | 0.025            | 0.001        | 0.420        | 0.172         | 0.005                         |
|                             | NRT              | $r_{pb}$   | -0.007                      | 0.175        | <b>0.354</b> | 0.251        | 0.263        | 0.255        | 0.115        | -0.024           | 0.175        | 0.133        | 0.147         | 0.266                         |
|                             |                  | $p$ -value | 0.926                       | 0.012        | <.001        | <.001        | <.001        | <.001        | 0.102        | 0.729            | 0.012        | 0.059        | 0.036         | <.001                         |
|                             | Bupropion        | $r_{pb}$   | -0.053                      | 0.179        | 0.100        | <b>0.584</b> | 0.391        | 0.345        | 0.173        | 0.211            | 0.156        | 0.100        | 0.223         | 0.271                         |
|                             |                  | $p$ -value | 0.451                       | 0.010        | 0.156        | <.001        | <.001        | <.001        | 0.014        | 0.002            | 0.026        | 0.156        | 0.001         | <.001                         |
|                             | Varenicline      | $r_{pb}$   | -0.049                      | 0.197        | 0.237        | 0.424        | <b>0.397</b> | 0.396        | 0.306        | 0.292            | 0.247        | 0.149        | 0.221         | 0.242                         |
|                             |                  | $p$ -value | 0.485                       | 0.005        | 0.001        | <.001        | <.001        | <.001        | <.001        | <.001            | <.001        | 0.033        | 0.002         | <.001                         |
|                             | Quitline         | $r_{pb}$   | 0.084                       | 0.209        | 0.182        | 0.524        | 0.448        | <b>0.563</b> | 0.298        | 0.249            | 0.318        | 0.300        | 0.445         | 0.186                         |
|                             |                  | $p$ -value | 0.233                       | 0.003        | 0.009        | <.001        | <.001        | <.001        | <.001        | <.001            | <.001        | <.001        | <.001         | 0.008                         |
|                             | Mobile app       | $r_{pb}$   | 0.117                       | 0.234        | 0.221        | 0.349        | 0.371        | 0.472        | <b>0.395</b> | 0.127            | 0.384        | 0.171        | 0.364         | 0.226                         |
|                             |                  | $p$ -value | 0.097                       | 0.001        | 0.001        | <.001        | <.001        | <.001        | <.001        | 0.070            | <.001        | 0.015        | <.001         | 0.001                         |
|                             | Written material | $r_{pb}$   | 0.013                       | 0.164        | 0.161        | 0.214        | 0.214        | 0.224        | 0.183        | <b>0.602</b>     | 0.110        | 0.161        | 0.129         | 0.107                         |
|                             |                  | $p$ -value | 0.854                       | 0.019        | 0.021        | 0.002        | 0.002        | 0.001        | 0.009        | <.001            | 0.116        | 0.021        | 0.067         | 0.128                         |
|                             | Counseling       | $r_{pb}$   | -0.143                      | 0.241        | 0.231        | 0.369        | 0.254        | 0.428        | 0.355        | 0.244            | <b>0.505</b> | 0.133        | 0.167         | 0.271                         |
|                             |                  | $p$ -value | 0.041                       | 0.001        | 0.001        | <.001        | <.001        | <.001        | <.001        | <.001            | <.001        | 0.059        | 0.017         | <.001                         |
|                             | Cold turkey      | $r_{pb}$   | 0.079                       | 0.038        | 0.179        | 0.141        | 0.152        | 0.235        | 0.228        | 0.087            | 0.070        | <b>0.550</b> | 0.112         | -0.053                        |
|                             |                  | $p$ -value | 0.262                       | 0.593        | 0.010        | 0.044        | 0.030        | 0.001        | 0.001        | 0.214            | 0.318        | <.001        | 0.111         | 0.448                         |
| Other tobacco               | $r_{pb}$         | 0.071      | 0.180                       | 0.146        | 0.256        | 0.222        | 0.286        | 0.191        | 0.089        | 0.182            | 0.146        | <b>0.268</b> | 0.213         |                               |
|                             | $p$ -value       | 0.312      | 0.010                       | 0.037        | <.001        | 0.001        | <.001        | 0.006        | 0.207        | 0.009            | 0.037        | <.001        | 0.002         |                               |
| Switched to ECs             | $r_{pb}$         | 0.080      | -0.019                      | 0.149        | 0.227        | 0.352        | 0.234        | 0.131        | 0.161        | 0.204            | 0.303        | 0.243        | <b>0.248</b>  |                               |
|                             | $p$ -value       | 0.255      | 0.783                       | 0.034        | 0.001        | <.001        | 0.001        | 0.062        | 0.021        | 0.003            | <.001        | <.001        | <.001         |                               |
